# Supplementary material for: Wavelength-tunable excited-state absorption and optical limiting effects in the Q band region based on silicon phthalocyanine oligomers
Source: Royal Society of Chemistry journal article supplement (doi:10.1039/c0cp01172j), 2010-01-01
Supplement: c0cp01172j.pdf [file c0cp01172j.pdf]

## Supplementary Information

### Analytical data of SiPc oligomers

#### (a) SiPc dimer, HO(SiPcO)<sub>2</sub>H:

Anal. Calcd for C<sub>96</sub>H<sub>98</sub>N<sub>16</sub>O<sub>3</sub>Si<sub>2</sub>: C, 72.97; H, 6.25; N, 14.18. Found: C, 73.95; H, 6.75; N, 13.19.

MALDI-TOF-mass m/z = 1579.1 (M<sup>+</sup>), UV-vis (Toluene) λ/nm (logε) 639.5 (5.5), 342.0 (5.1)

#### (b) SiPc trimer, HO(SiPcO)<sub>3</sub>H:

Anal. Calcd for C<sub>144</sub>H<sub>146</sub>N<sub>24</sub>O<sub>4</sub>Si<sub>3</sub>: C, 73.25; H, 6.23; N, 14.24. Found: C, 73.32; H, 6.65; N, 13.24(4).

MALDI-TOF-mass m/z = 2359.6 (M<sup>+</sup>), UV-vis (Toluene) λ/nm (logε) 626.5 (5.5), 335.5 (5.4)

#### (c) SiPc tetramer, HO(SiPcO)<sub>4</sub>H:

Anal. Calcd for C<sub>192</sub>H<sub>194</sub>N<sub>32</sub>O<sub>5</sub>Si<sub>4</sub>: C, 73.39; H, 6.22; N, 14.26. Found: C, 74.06; H, 6.27; N, 13.32.

MALDI-TOF-mass m/z = 3139.1 (M<sup>+</sup>), UV-vis (Toluene) λ/nm (logε) 621.5 (5.6), 330.5 (5.3)

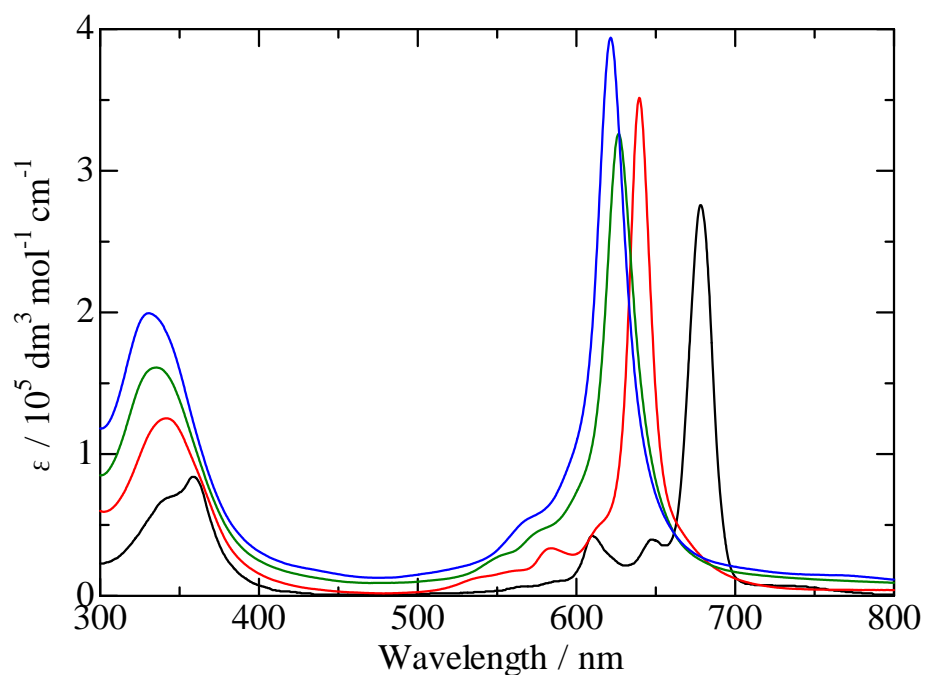

**Fig. S1** Ground-state absorption spectra of SiPc oligomers (dimer: red line, trimer: green line, tetramer: blue line) in toluene in addition to a spectrum of the corresponding monomer (black line). The Q band peak (monomer: 678 nm, dimer: 639.5 nm, trimer: 626.5 nm, tetramer: 621.5 nm) shifts to the blue-side with increasing the number of SiPc units, which is explained by the exciton interaction. The  $\epsilon$  values of the Soret and Q band increase due to oligomerization reflecting an increase in the number of SiPc units, whereas the  $\epsilon$  value of the Q band is slightly smaller in the trimer than the dimer because of the broad bandwidth of the trimer.

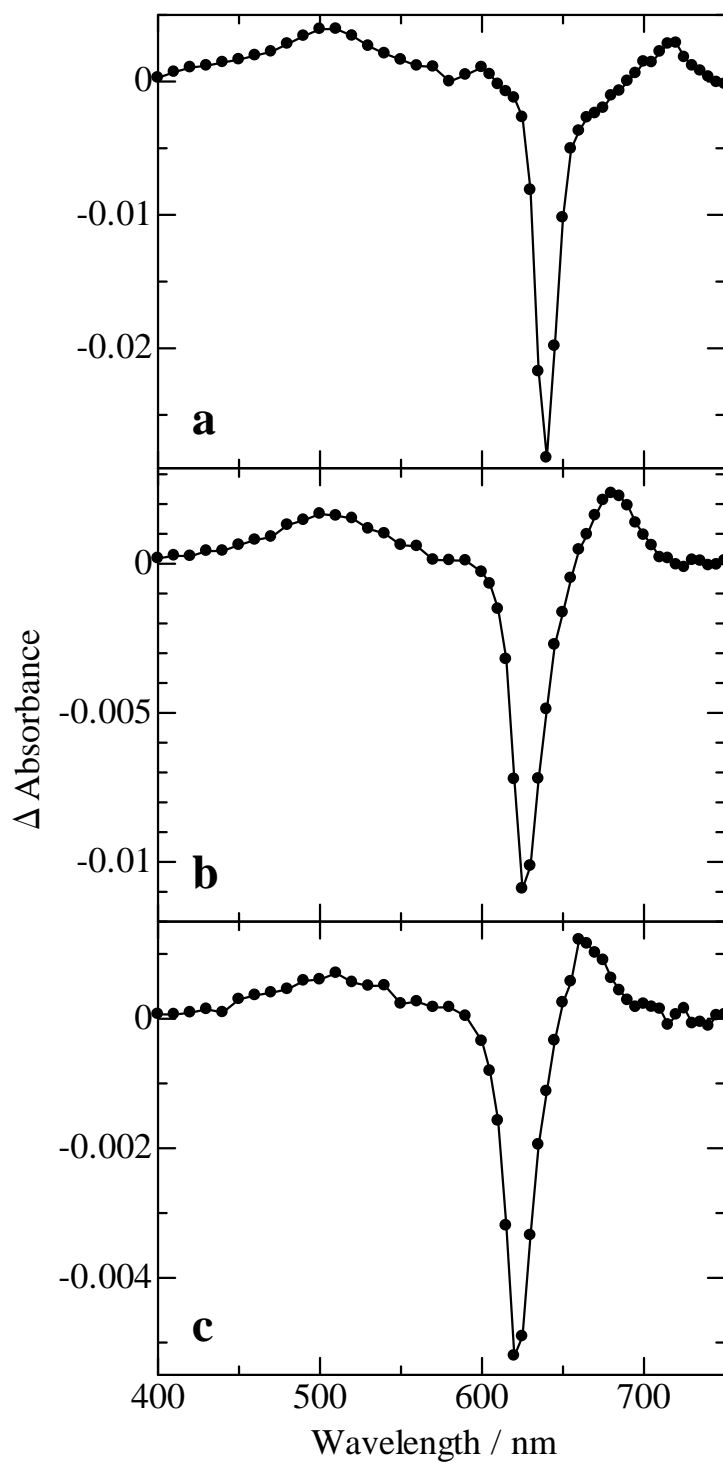

**Fig. S2** Transient difference absorption spectra of SiPc oligomers (**a**: dimer, **b**: trimer, **c**: tetramer) in toluene.

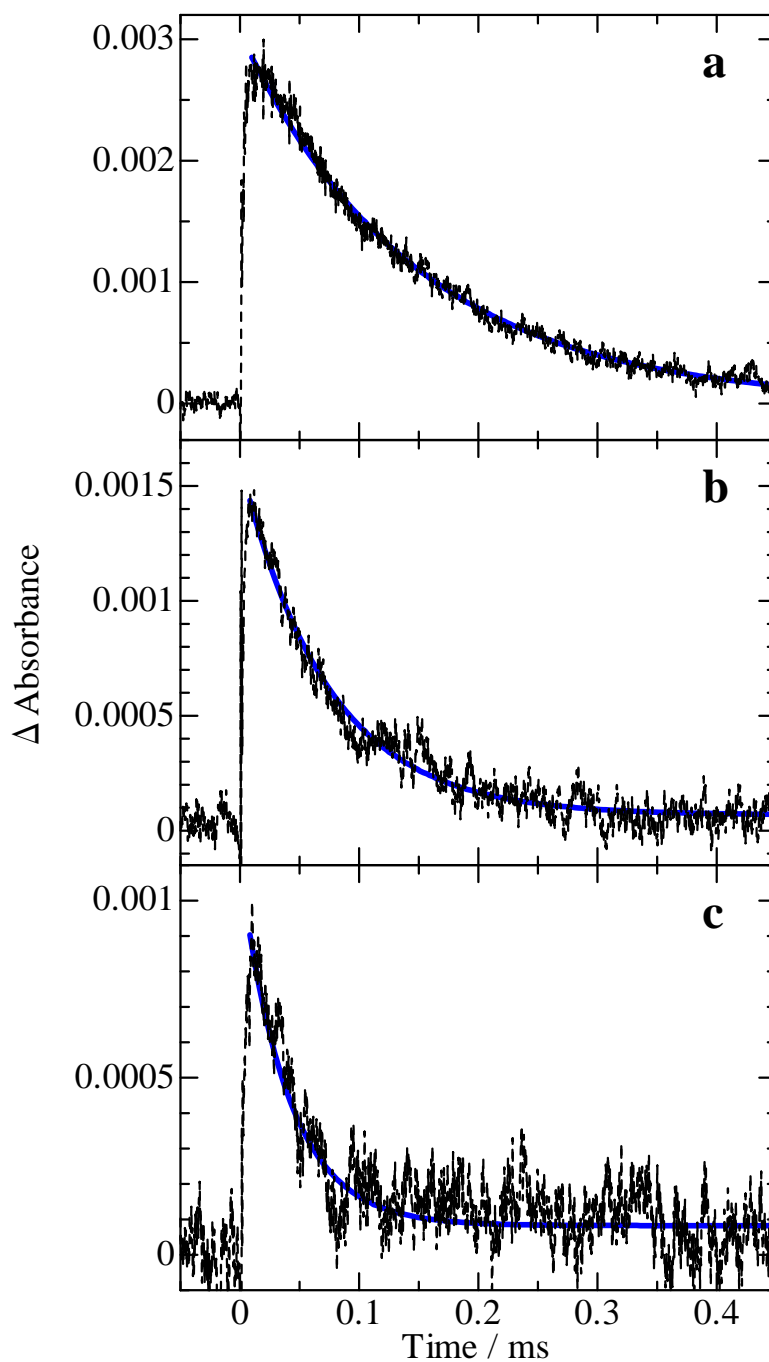

**Fig. S3** Time-profiles of transient absorption signals of the dimer (**a**), trimer (**c**), and tetramer (**d**), respectively. The  $T_1$  lifetime decreases in the order monomer ( $500 \mu\text{s}$ ) > dimer ( $150 \mu\text{s}$ ) > trimer ( $73 \mu\text{s}$ ) > tetramer ( $40 \mu\text{s}$ ).

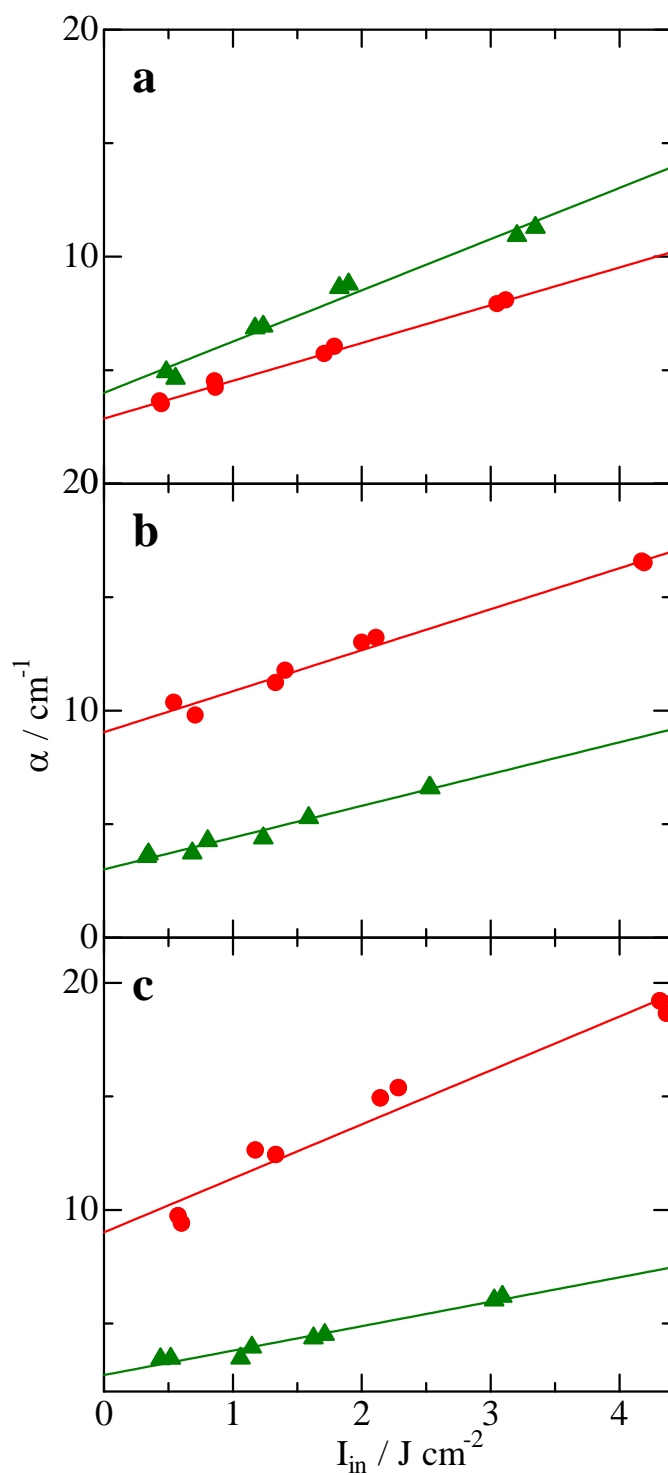

**Fig. S4** Relationships between the incident light ( $I_{in}$ ) and  $\alpha$  ( $= \alpha_0 + \beta I_{in}$ ) at 532 nm (▲) and for the excited-state Q band (●: 720nm, 670nm, and 660nm for the dimer, trimer, and tetramer, respectively). The linear ( $\alpha_0$ ) and non-linear absorption ( $\beta$ ) coefficients were evaluated from the gradients and y-intercepts in these figures, respectively.
